# Supplementary material for: The Minichromosome Maintenance Complex Component 2 (MjMCM2) of Meloidogyne javanica is a potential effector regulating the cell cycle in nematode-induced galls
Source: PubMed Central journal article supplement (PMC9163083; doi:10.1038/s41598-022-13020-8), 2022-06-02
Supplement: 41598_2022_13020_MOESM6_ESM.pdf [file 41598_2022_13020_MOESM6_ESM.pdf]

**Table S2** List of selected candidate RxLR effectors derived from *effectR* and carrying a degenerated RxLR-like motif. Secretion likelihood was calculated for each protein using the SignalP 5.0 server and SecretomeP 2.0 server.

| Seq Name                                     | Description                                                         | Length | RxLR       |              | SignalP                       |
|----------------------------------------------|---------------------------------------------------------------------|--------|------------|--------------|-------------------------------|
|                                              |                                                                     |        | Start      | Motif        |                               |
| <b>Coping with oxidative stress proteins</b> |                                                                     |        |            |              |                               |
| M. javanica_Scaff24603g089596                | KJH49643.1copper/zinc superoxide dismutase                          | 368    | 104        | RELR         | Sp 0.0022<br>SecP 0.561       |
| M.Javanica_Scaff436g006256                   | zinc superoxide dismutase                                           | 567    | 124        | RELR         | Sp 0.9951<br>SecP 0.158       |
| <b>Cell-cycle regulator</b>                  |                                                                     |        |            |              |                               |
| M. javanica_Scaff12914g066007                | VIO95430.1 CDC5 protein, putative                                   | 655    | 192        | RELR         | Sp 0.0003<br>SecP 0.307       |
| M.Javanica_Scaff134g002415                   | XP_001901183.1cell cycle-regulated factor p78                       | 525    | 299        | RELR         | Sp 0.0004<br>SecP 0.405       |
| M.Javanica_Scaff2271g021798                  | VIO94497.1DNA replication licensing factor MCM2, putative           | 800    | 168<br>763 | RLLR<br>RQLR | Sp 0.0017<br>SecP 0.068       |
| M. javanica_Scaff3561g029820                 | XP_018299661.1 cyclin-related protein FAM58A isoform X1             | 229    | 114<br>133 | RCLR<br>RLLR | Sp 0.0077<br>SecP 0.078       |
| <b>Cell wall associated</b>                  |                                                                     |        |            |              |                               |
| M.Javanica_Scaff5917g041634                  | CDJ83353.1Glycoside hydrolase domain containing protein             | 553    | 478        | RSLR         | Sp 0.967<br>SecP 0.148        |
| M.Javanica_Scaff549g007494                   | 5-L-arabinanase 1                                                   | 131    | 43         | RSLR         | SecP 0.545<br>Sp 0.054        |
| M. javanica_Scaff489g006850                  | KHN72422.1Laminin-like protein epi-1                                | 4453   | 2328       | RGLR         | Sp 0.9731<br>SecP 0.796       |
| <b>Cell metabolism and nutrition</b>         |                                                                     |        |            |              |                               |
| M. javanica_Scaff22595g086427                | XP_001899998.1Alpha amylase, catalytic domain containing protein    | 232    | 95         | RSLR         | Sp 0.3822<br>SecP 0.08        |
| M.Javanica_Scaff563g007635                   | KHN76296.1ER degradation-enhancing alpha-mannosidase-like protein 1 | 581    | 505        | RSLR         | Sp 0.967<br>SecP 0.160        |
| M.Javanica_Scaff2667g024454                  | KHN84842.1Zinc metalloproteinase dpy-31                             | 315    | 56         | RRLR         | Sp0.9651<br>SecP 0.056        |
| M.Javanica_Scaff1607g017013                  | XP_024501469.1Protease-associated domain                            | 381    | 291        | RRLR         | SP 0.378<br>SecP 0.276        |
| M. javanica_Scaff22913g086941                | XP_024507885.1Glutaryl-Coenzyme A dehydrogenase                     | 269    | 10         | RTLr         | Sp 0.0038<br>Secp 0.142       |
| M. javanica_Scaff7372g047821                 | XP_020306027.1vacuolar protein sorting-associated protein 54        | 127    | 104        | RALR         | Sp 0.0005<br>SecP 0.959       |
| M. javanica_Scaff31269g098493                | GBM86013.1Glucose dehydrogenase [FAD, quinone]                      | 278    | 109        | RSLR         | Signal P 0.0038<br>SecP       |
| M. javanica_Scaff7527g048450                 | CEF62898.1 Sulfurtransferase                                        | 159    | 119        | RLLR         | Signal P 0.019<br>SecP 0.4622 |
| M. javanica_Scaff219g003587                  | Proline dehydrogenase                                               | 661    | 136        | RILR         | SP 0.001<br>Secp 0.129        |
| M. javanica_Scaff17035g075846                | KHN75925.1Glutamyl aminopeptidase                                   | 629    | 386<br>545 | RFLR<br>RQLR | Sp 0.0055<br>Secp 0.259       |
| M. javanica_Scaff13529g067570                | XP_014591970.2cytosolic endo-beta-N-acetylglucosaminidase isoform   | 340    | 190        | RKLR         | Sp 0.0011<br>SecP 0.134       |
| M. javanica_Scaff3885g031723                 | XP_026217022.1cytosolic endo-beta-N-acetylglucosaminidase           | 413    | 82<br>85   | RKLR<br>RGLR | Sp 0.025<br>SecP 0.160        |
| M. javanica_Scaff30641g097757                | fatty acid desaturase fat-4                                         | 265    | 154        | RELR         | Sp 0.0008<br>SecP 0.06        |
